# Supplementary material for: Melatonin Improves Turbot Oocyte Meiotic Maturation and Antioxidant Capacity, Inhibits Apoptosis-Related Genes mRNAs In Vitro
Source: MDPI journal article supplement (doi:10.3390/antiox12071389), 2023-07-06
Supplement: s1 [file s1]

**Table S1** Gonadosomatic index of turbot during ovarian development (Gonadal weight/body weight).

|             |           | Repeat  | Repeat  | Repeat  | Repeat  | Repeat  |
|-------------|-----------|---------|---------|---------|---------|---------|
| Ovary stage |           | group 1 | group 2 | group 3 | group 4 | group 5 |
| Body weight |           | 577.03  | 626.93  | 774.16  | 672.3   | 666.6   |
| Gonadal     | Prevgtg   | 5.9     | 5.87    | 7.24    | 7.7     | 6.6     |
| weight      |           |         |         |         |         |         |
| Body weight |           | 1498    | 1521.3  | 1688.21 | 1365.2  | 1566.6  |
| Gonadal     | Evtg      | 39.12   | 40.21   | 50.11   | 39.21   | 48.2    |
| weight      |           |         |         |         |         |         |
| Body weight |           | 2916.08 | 1958.25 | 1926.22 | 2378.02 | 3517.75 |
| Gonadal     | Latvtg    | 226.5   | 167.45  | 181.84  | 224.55  | 292.78  |
| weight      |           |         |         |         |         |         |
| Body weight |           | 2184    | 2053    | 2435    | 2666    | 2872.1  |
| Gonadal     | Mig-nucle | 221.2   | 239.74  | 230.2   | 237.1   | 281.2   |
| weight      |           |         |         |         |         |         |
| Body weight |           | 2672.62 | 2687.1  | 2541.1  | 2399.3  | 2890.12 |
| Gonadal     | Atre      | 55.17   | 50.12   | 48.21   | 43.2    | 66.7    |
| weight      |           |         |         |         |         |         |

**Table S2** Proportion of oocyte during ovarian development (Different types of oocyte numbers/Total oocyte number).

| Groups         | Oocyte stage | Prevtg | Evtg | Latvtg | Mig-nucle | Atre |
|----------------|--------------|--------|------|--------|-----------|------|
| Repeat group 1 | I            | 174    | 26   | 3      | 3         | 18   |
|                | II           | 0      | 35   |        |           |      |
|                | III          | 0      | 0    | 15     | 2         |      |
|                | IV           | 0      | 0    | 1      | 11        |      |
|                | V            | 0      | 0    |        |           | 11   |
| Repeat group 2 | I            | 168    | 22   | 3      | 4         | 20   |
|                | II           | 0      | 38   |        |           |      |
|                | III          | 0      | 0    | 18     | 3         |      |
|                | IV           | 0      | 0    | 2      | 10        |      |
|                | V            | 0      | 0    |        |           | 9    |
| Repeat group 3 | I            | 182    | 21   | 6      | 5         | 15   |
|                | II           | 0      | 37   |        |           |      |
|                | III          | 0      | 0    | 15     | 3         |      |
|                | IV           | 0      | 0    | 3      | 12        |      |
|                | V            | 0      | 0    |        |           | 13   |
| Repeat group 4 | I            | 191    | 18   | 3      | 3         | 15   |
|                | II           | 0      | 31   |        |           |      |
|                | III          | 0      | 0    | 17     | 3         |      |
|                | IV           | 0      | 0    | 3      | 10        |      |
|                | V            | 0      | 0    |        |           | 13   |
| Repeat group 5 | I            | 158    | 21   | 5      | 3         | 17   |
|                | II           | 0      | 30   |        |           |      |

|     |   |   |    |   |    |
|-----|---|---|----|---|----|
| III | 0 | 0 | 18 | 1 |    |
| IV  | 0 | 0 | 1  | 8 |    |
| V   | 0 | 0 |    |   | 14 |

**Table S3** The GVBD of different diameters of follicle culture in *vitro*.

| Repeat | Control   | Control     | Control     | DHP         | DHP         | DHP         |
|--------|-----------|-------------|-------------|-------------|-------------|-------------|
| group  | (<0.5mm)  | (0.5-0.7mm) | (>0.7mm)    | (<0.5mm)    | (0.5-0.7mm) | (>0.7mm)    |
| 1      | 4.2689468 | 12.25044075 | 15.82620521 | 6.639667859 | 11.10148002 | 15.83335902 |
| 2      | 5.9676598 | 9.32382009  | 11.86267074 | 4.911360607 | 12.58636876 | 19.77559944 |
| 3      | 3.7633934 | 8.425739164 | 14.31112405 | 4.448971534 | 10.31215121 | 18.39104155 |

**Table S4** The GVBD of different diameters oocyte culture *in vitro*

| Repeat | Control     | Control     | Control     | DHP         | DHP         | DHP         |
|--------|-------------|-------------|-------------|-------------|-------------|-------------|
| group  | (<0.5mm)    | (0.5-0.7mm) | (>0.7mm)    | (<0.5mm)    | (0.5-0.7mm) | (>0.7mm)    |
| 1      | 6.896551724 | 14.89361702 | 63.15789474 | 8.333333333 | 28.57142857 | 57.69230769 |
| 2      | 5.263157895 | 18.91891892 | 60.97560976 | 7.317073171 | 31.11111111 | 67.39130435 |
| 3      | 6.12244898  | 14.89361702 | 74.35897436 | 9.090909091 | 30.95238095 | 75.67567568 |

**Table S5** Effects of melatonin on turbot follicle GVBD (%).

| Time | Repeat | Control     | Melatonin              | Melatonin              | Melatonin              | Melatonin              |
|------|--------|-------------|------------------------|------------------------|------------------------|------------------------|
|      | group  |             | (10 <sup>-8</sup> g/L) | (10 <sup>-7</sup> g/L) | (10 <sup>-6</sup> g/L) | (10 <sup>-5</sup> g/L) |
|      | 1      | 0           | 0                      | 0                      | 0                      | 0                      |
| 3h   | 2      | 0           | 0                      | 0                      | 0                      | 0                      |
|      | 3      | 0           | 0                      | 0                      | 0                      | 0                      |
|      | 1      | 0           | 0.100759654            | 0.683047872            | 0.839093506            | 1.226996892            |
| 6h   | 2      | 0           | 0.107264503            | 0.631464336            | 0.891998509            | 0.950490711            |
|      | 3      | 0           | 0.114121831            | 0.716862192            | 1.168530985            | 0.829889397            |
|      | 1      | 0.179274941 | 0.231671207            | 2.415739479            | 4.768534135            | 3.01082524             |
| 9h   | 2      | 0.024396131 | 0.212609471            | 1.668181025            | 3.544151109            | 4.344452165            |
|      | 3      | 0.166560218 | 0.200011298            | 2.26070914             | 3.256637756            | 4.648490595            |
|      | 1      | 0.242390559 | 0.307299467            | 6.162589529            | 12.21956998            | 13.53593824            |
| 12h  | 2      | 0.161799434 | 0.346022042            | 4.129572987            | 9.633593495            | 15.46377698            |
|      | 3      | 0.231390007 | 0.313116455            | 7.093703576            | 13.01248278            | 16.08481734            |
|      | 1      | 5.988435571 | 5.247361285            | 12.14998797            | 23.0069338             | 24.11987457            |
| 18h  | 2      | 5.238302541 | 7.223676145            | 14.07865129            | 20.69667591            | 23.09102764            |
|      | 3      | 7.547968388 | 6.041402878            | 15.51704567            | 22.86927768            | 26.99917672            |
|      | 1      | 7.727608412 | 12.29247501            | 17.34313941            | 26.27223978            | 27.04575302            |
| 24h  | 2      | 10.31549898 | 10.0803397             | 19.34131455            | 27.42302768            | 30.44983959            |
|      | 3      | 12.00075225 | 9.705515771            | 16.93304066            | 29.91867812            | 31.47839736            |

**Table S6** Effects of melatonin on turbot oocyte GVBD (%).

| Time | Repeat | Control     | Melatonin<br>(10 <sup>-8</sup> g/L) | Melatonin<br>(10 <sup>-7</sup> g/L) | Melatonin<br>(10 <sup>-6</sup> g/L) | Melatonin<br>(10 <sup>-5</sup> g/L) |
|------|--------|-------------|-------------------------------------|-------------------------------------|-------------------------------------|-------------------------------------|
|      | group  |             |                                     |                                     |                                     |                                     |
|      | 1      | 0           | 0                                   | 0                                   | 0                                   | 0                                   |
| 3h   | 2      | 0           | 0                                   | 0                                   | 0                                   | 0                                   |
|      | 3      | 0           | 0                                   | 0                                   | 0                                   | 0                                   |
|      | 1      | 0           | 0.113603464                         | 0.673633561                         | 1.40430908                          | 1.465945662                         |
| 6h   | 2      | 0           | 0.115279124                         | 0.721542386                         | 1.258438414                         | 1.566840102                         |
|      | 3      | 0           | 0.101793613                         | 0.768244054                         | 1.643878506                         | 1.894315536                         |
|      | 1      | 0.273357798 | 0.28560915                          | 4.448873916                         | 5.468209188                         | 8.454996306                         |
| 9h   | 2      | 0.340316974 | 0.26979157                          | 3.623196235                         | 6.310249661                         | 10.07316188                         |
|      | 3      | 0.445645029 | 0.304493045                         | 3.827552849                         | 7.217976151                         | 8.403506182                         |
|      | 1      | 0.311122679 | 0.399163263                         | 6.757398579                         | 19.95701649                         | 21.44941849                         |
| 12h  | 2      | 0.396473207 | 0.439366478                         | 7.622378936                         | 17.9680608                          | 19.63857694                         |
|      | 3      | 0.373347629 | 0.438261559                         | 9.969968485                         | 16.08198501                         | 18.56558771                         |
|      | 1      | 9.092154766 | 7.945070126                         | 16.23862056                         | 28.64840732                         | 26.11715773                         |
| 18h  | 2      | 7.178889401 | 6.237703768                         | 18.83909981                         | 23.86673373                         | 31.40283654                         |
|      | 3      | 9.361825979 | 7.280584177                         | 18.25166982                         | 26.01334139                         | 31.95887693                         |
|      | 1      | 19.76996208 | 15.09475426                         | 22.89667125                         | 40.23619537                         | 44.40648388                         |
| 24h  | 2      | 14.63297078 | 11.98337449                         | 18.75256829                         | 35.88474528                         | 37.08588567                         |
|      | 3      | 11.90234198 | 11.74762883                         | 18.98939767                         | 36.95797513                         | 41.53670415                         |

**Table S7** Effects of DHP on turbot follicle GVBD (%).

| Time | Repeat | Control     | Melatonin              | Melatonin              | Melatonin              | Melatonin              |
|------|--------|-------------|------------------------|------------------------|------------------------|------------------------|
|      | group  |             | (10 <sup>-8</sup> g/L) | (10 <sup>-7</sup> g/L) | (10 <sup>-6</sup> g/L) | (10 <sup>-5</sup> g/L) |
|      | 1      | 0           | 0                      | 0                      | 0                      | 0                      |
| 3h   | 2      | 0           | 0                      | 0                      | 0                      | 0                      |
|      | 3      | 0           | 0                      | 0                      | 0                      | 0                      |
|      | 1      | 0           | 0                      | 0                      | 0                      | 0                      |
| 6h   | 2      | 0           | 0                      | 0                      | 0                      | 0                      |
|      | 3      | 0           | 0                      | 0                      | 0                      | 0                      |
|      | 1      | 0.109547459 | 0.131736046            | 0.11115063             | 0.135752919            | 0.157610354            |
| 9h   | 2      | 0.218073169 | 0.151421499            | 0.108167261            | 0.144106818            | 0.142876636            |
|      | 3      | 0.046350372 | 0.147073745            | 0.125026668            | 0.120367851            | 0.163484009            |
|      | 1      | 0.163681117 | 0.187603029            | 0.209584551            | 0.320840013            | 0.2662963              |
| 12h  | 2      | 0.24620092  | 0.296642814            | 0.292817558            | 0.216500523            | 0.317911091            |
|      | 3      | 0.232117962 | 0.241334157            | 0.170239184            | 0.158233108            | 0.207792609            |
|      | 1      | 7.450023442 | 6.737838448            | 5.450890228            | 6.757791929            | 6.190942815            |
| 18h  | 2      | 5.078074679 | 5.074525014            | 7.622552168            | 5.215637588            | 7.737339143            |
|      | 3      | 6.43625188  | 6.962343038            | 6.029851093            | 7.401089236            | 5.636068041            |
|      | 1      | 8.809667964 | 11.7117805             | 11.80908682            | 11.70551368            | 13.38619465            |
| 24h  | 2      | 12.64727043 | 8.154252962            | 8.354048               | 11.35225536            | 9.420258345            |
|      | 3      | 8.870725502 | 10.80141434            | 10.84502832            | 8.745945071            | 10.857897              |



**Table S8** Effects of DHP on turbot oocyte GVBD.

| Time | Repeat | Control     | Melatonin<br>(10 <sup>-8</sup> g/L) | Melatonin<br>(10 <sup>-7</sup> g/L) | Melatonin<br>(10 <sup>-6</sup> g/L) | Melatonin<br>(10 <sup>-5</sup> g/L) |
|------|--------|-------------|-------------------------------------|-------------------------------------|-------------------------------------|-------------------------------------|
|      | 1      | 0           | 0                                   | 0                                   | 0                                   | 0                                   |
| 3h   | 2      | 0           | 0                                   | 0                                   | 0                                   | 0                                   |
|      | 3      | 0           | 0                                   | 0                                   | 0                                   | 0                                   |
|      | 1      | 0           | 0.204347515                         | 0.890018398                         | 0.992409407                         | 1.084245111                         |
| 6h   | 2      | 0           | 0.240279712                         | 0.619150611                         | 0.998108032                         | 1.65283264                          |
|      | 3      | 0           | 0.199226397                         | 0.917781785                         | 0.898682561                         | 1.208199297                         |
|      | 1      | 0.294484221 | 0.472642767                         | 2.069178251                         | 4.188962871                         | 3.32065568                          |
| 9h   | 2      | 0.319157801 | 0.40241143                          | 2.721916                            | 3.141138477                         | 4.527685883                         |
|      | 3      | 0.156377979 | 0.433616924                         | 2.549807947                         | 1.76373378                          | 5.459485635                         |
|      | 1      | 0.412068009 | 0.476835091                         | 7.400844771                         | 9.793078778                         | 12.98663528                         |
| 12h  | 2      | 0.355769169 | 0.487155574                         | 6.436776641                         | 11.31819414                         | 12.71819695                         |
|      | 3      | 0.324024958 | 0.387026585                         | 6.21039666                          | 11.13269849                         | 12.72156777                         |
|      | 1      | 9.579196973 | 7.911692922                         | 13.90516337                         | 19.69984813                         | 24.81114447                         |
| 18h  | 2      | 9.033960642 | 9.032178579                         | 13.19727212                         | 21.90262421                         | 25.11093666                         |
|      | 3      | 7.278630411 | 10.2662801                          | 15.42076451                         | 21.27219433                         | 25.06991886                         |
|      | 1      | 17.0958562  | 14.43845721                         | 16.39801853                         | 28.52227312                         | 30.41915347                         |
| 24h  | 2      | 12.67827335 | 12.09460806                         | 19.42853805                         | 25.56206688                         | 35.12871502                         |
|      | 3      | 14.49378712 | 15.78326307                         | 19.59893019                         | 25.84827723                         | 28.85606477                         |

**Table S9** The expression of *mtnrs* mRNA.

|          | Repeat group | Mtnr1       | Mtnr2       | Mtnr3       |
|----------|--------------|-------------|-------------|-------------|
| Oocyte   | 1            | 1.200088874 | 0.244197016 | 0.887818289 |
|          | 2            | 1.087164879 | 0.220547603 | 0.796387642 |
|          | 3            | 0.913626377 | 0.215786288 | 0.701157158 |
|          | 4            | 0.966747845 | 0.211394328 | 0.71557     |
|          | 5            | 0.867779396 | 0.168484804 | 0.679393399 |
| Follicle | 1            | 1.739896288 | 0.085679335 | 0.187444476 |
|          | 2            | 1.563991609 | 0.066234491 | 0.189452047 |
|          | 3            | 1.786652315 | 0.068371601 | 0.173240218 |
|          | 4            | 1.555728196 | 0.076499611 | 0.195746975 |
|          | 5            | 1.670793513 | 0.078806526 | 0.166770618 |

**Table S10** The expression of *mtnrs* mRNA in follicle.

|                                     | Repeat group | Mtnr1       | Mtnr2       | Mtnr3       |
|-------------------------------------|--------------|-------------|-------------|-------------|
| Control                             | 1            | 23.15780387 | 1.173206981 | 1.391755782 |
|                                     | 2            | 20.25077252 | 0.921756023 | 1.655687728 |
|                                     | 3            | 16.66428444 | 0.924718141 | 0.945787738 |
| Melatonin<br>(10 <sup>-6</sup> g/L) | 1            | 102.578203  | 0.916326753 | 0.744288601 |
|                                     | 2            | 91.07504302 | 0.720086216 | 0.720086216 |
|                                     | 3            | 95.87155684 | 0.671217682 | 0.671217682 |

**Table S11** Effect of melatonin on *mtnrs* expression in oocyte.

|                                     | Repeat group | Mtnr1       | Mtnr2       | Mtnr3       |
|-------------------------------------|--------------|-------------|-------------|-------------|
| Control                             | 1            | 19.55481498 | 1.077736701 | 0.354286696 |
|                                     | 2            | 17.50489784 | 1.046251577 | 0.487446688 |
|                                     | 3            | 15.99120693 | 0.886852106 | 0.593625185 |
| Melatonin<br>(10 <sup>-6</sup> g/L) | 1            | 17.27302933 | 0.072176284 | 0.107855436 |
|                                     | 2            | 16.32038269 | 0.123399912 | 0.071209792 |
|                                     | 3            | 17.19865708 | 0.769573875 | 0.103527839 |

**Table S12** Effect of melatonin on the antioxidant capacity of follicle and oocyte.

|            |                        | Repeat group | follicle    | oocyte      |
|------------|------------------------|--------------|-------------|-------------|
|            |                        | 1            | 3.59231499  | 4.948542159 |
|            | Control                | 2            | 4.034304432 | 2.992898332 |
| SOD        |                        | 3            | 4.951820814 | 4.692089818 |
| activities | Melatonin              | 1            | 6.707746087 | 5.964263047 |
|            | (10 <sup>-6</sup> g/L) | 2            | 7.983990431 | 7.427252447 |
|            |                        | 3            | 6.640359128 | 6.464321565 |
|            |                        | 1            | 142.0077276 | 82.56404263 |
|            | Control                | 2            | 133.884472  | 97.07547752 |
| CAT        |                        | 3            | 101.5647201 | 91.80404363 |
| activities | Melatonin              | 1            | 161.0108528 | 130.4110095 |
|            | (10 <sup>-6</sup> g/L) | 2            | 195.4486038 | 115.7343045 |
|            |                        | 3            | 188.7505486 | 112.6633752 |
|            |                        | 1            | 3.915826271 | 3.739082328 |
|            | Control                | 2            | 3.14444589  | 2.298594168 |
| GSH-Px     |                        | 3            | 3.349746178 | 3.568014894 |
| activities | Melatonin              | 1            | 9.88141757  | 6.104591195 |
|            | (10 <sup>-6</sup> g/L) | 2            | 8.354639224 | 6.474015125 |
|            |                        | 3            | 7.589518814 | 5.917320277 |
|            |                        | 1            | 17.64906499 | 21.59321262 |
|            | Control                | 2            | 22.76154411 | 25.58061607 |
| GSH        |                        | 3            | 23.35394606 | 26.76661479 |
| content    | Melatonin              | 1            | 38.56493761 | 31.1003376  |
|            | (10 <sup>-6</sup> g/L) | 2            | 50.07854568 | 39.09275426 |
|            |                        | 3            | 52.5487167  | 41.19382007 |

|         |                        |   |             |             |
|---------|------------------------|---|-------------|-------------|
|         |                        | 1 | 1.435039078 | 1.490085515 |
|         | Control                | 2 | 1.206630402 | 1.296193472 |
| MDA     |                        | 3 | 1.423049305 | 1.461854036 |
| content | Melatonin              | 1 | 0.688397714 | 0.814528695 |
|         | (10 <sup>-6</sup> g/L) | 2 | 0.774424727 | 0.726515983 |
|         |                        | 3 | 0.796033894 | 0.824792369 |
|         |                        | 1 | 127285.675  | 72317.34595 |
|         | Control                | 2 | 125748.0916 | 65783.47891 |
| MDA     |                        | 3 | 119856.3463 | 65296.48388 |
| content | Melatonin              | 1 | 59662.35117 | 47139.99783 |
|         | (10 <sup>-6</sup> g/L) | 2 | 59351.33117 | 46782.57906 |
|         |                        | 3 | 53900.05189 | 41239.83773 |

**Table S13** Relative expression of *p53*, *caspae3*, *bax*, *bcl2* mRNAs and *bax/bcl2* in follicle.

|          |                                     | Repeat group | follicle    | oocyte      |
|----------|-------------------------------------|--------------|-------------|-------------|
| p53      | Control                             | 1            | 1.132681946 | 0.518481475 |
|          |                                     | 2            | 0.990882495 | 0.459561015 |
|          |                                     | 3            | 0.948459694 | 0.48000968  |
|          | Melatonin<br>(10 <sup>-6</sup> g/L) | 1            | 0.33541095  | 0.518481475 |
|          |                                     | 2            | 0.282047357 | 0.459561015 |
|          |                                     | 3            | 0.327803137 | 0.48000968  |
|          | Control                             | 1            | 0.963255805 | 1.292898167 |
|          |                                     | 2            | 1.067269735 | 1.148947544 |
|          |                                     | 3            | 0.97271177  | 1.166669734 |
| caspase3 | Melatonin<br>(10 <sup>-6</sup> g/L) | 1            | 0.121662938 | 0.033103976 |
|          |                                     | 2            | 0.114559855 | 0.037724607 |
|          |                                     | 3            | 0.128339031 | 0.015101958 |
|          | Control                             | 1            | 0.819296918 | 0.483620235 |
|          |                                     | 2            | 1.030095896 | 0.406863389 |
|          |                                     | 3            | 1.184898151 | 0.414227511 |
|          | Melatonin<br>(10 <sup>-6</sup> g/L) | 1            | 0.131377089 | 0.115355125 |
|          |                                     | 2            | 0.15995842  | 0.135549038 |
|          |                                     | 3            | 0.144932972 | 0.133652456 |
| bcl2     | Control                             | 1            | 1.271956275 | 1.060269357 |
|          |                                     | 2            | 0.913020061 | 0.868802521 |
|          |                                     | 3            | 0.861087922 | 0.878413655 |
|          | Melatonin<br>(10 <sup>-6</sup> g/L) | 1            | 2.353685848 | 1.299571367 |
|          |                                     | 2            | 2.252086289 | 1.608773137 |
|          |                                     | 3            | 2.22285182  | 1.813371313 |

|          |                        |   |             |             |
|----------|------------------------|---|-------------|-------------|
| bax/bcl2 |                        | 1 | 0.644123492 | 0.061577025 |
|          | Control                | 2 | 1.128229203 | 0.058335726 |
|          |                        | 3 | 1.376047812 | 0.071960901 |
|          | Melatonin              | 1 | 0.456129597 | 0.088763978 |
|          | (10 <sup>-6</sup> g/L) | 2 | 0.468303647 | 0.052430361 |
|          |                        | 3 | 0.471563151 | 0.074749742 |
